# Supplementary material for: Hippocampal interleukin-33 mediates neuroinflammation-induced cognitive impairments
Source: Springer Nature journal article supplement (doi:10.1186/s12974-020-01939-6), 2020-09-11

# Addition file 1

(a)

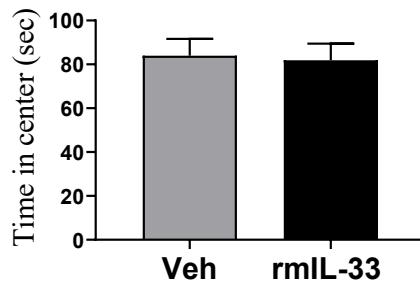

(b)

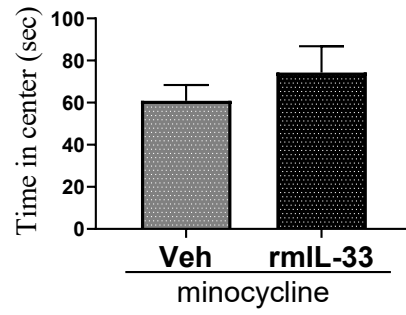

(c)

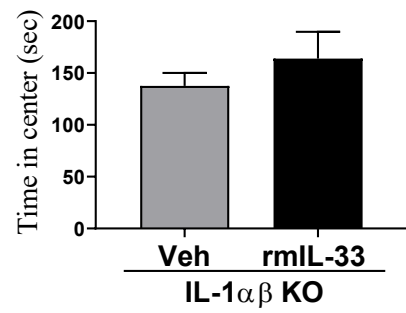

Supplement: MOESM1 [file 18371112]
