# Supplementary material for: Hippocampal interleukin-33 mediates neuroinflammation-induced cognitive impairments
Source: Springer Nature journal article supplement (doi:10.1186/s12974-020-01939-6), 2020-09-11

Addition file 2

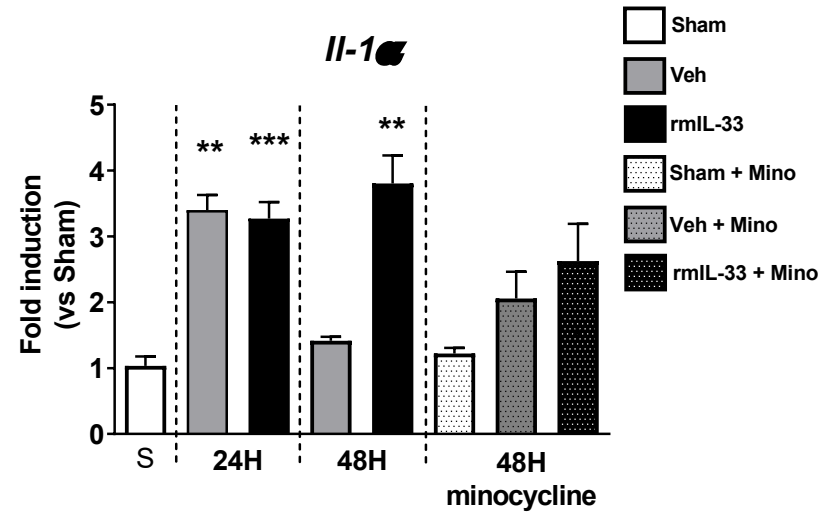

Supplement: MOESM2 [file 18371112]
